# Supplementary material
Source: PubMed Central journal article supplement (PMC3839056)
Supplement: NIHMS493784-supplement-01.pdf [file NIHMS493784-supplement-01.pdf]

# Cost of a Group Translation of the Diabetes Prevention Program

## Healthy Living Partnerships to Prevent Diabetes

Michael S. Lawlor, PhD, Caroline S. Blackwell, BS, Scott P. Isom, MS, Jeffrey A. Katula, PhD,  
Mara Z. Vitolins, DrPH, Timothy M. Morgan, PhD, David C. Goff, Jr., MD, PhD

### Unit costs used for calculating costs of HELP PD by type of cost

| Item                                              | Unit           | Cost (median/M, \$) | Source  |
|---------------------------------------------------|----------------|---------------------|---------|
| <b>DIRECT MEDICAL COSTS</b>                       |                |                     |         |
| <b>HELP PD personnel</b>                          |                |                     |         |
| Community health worker                           | 1 hour         | 100.00              | HELP PD |
| Registered dietician                              | 1 hour         | 30.77               | HELP PD |
| Exercise specialist                               | 1 hour         | 26.93               | HELP PD |
| <b>Materials</b>                                  |                |                     |         |
| Lifestyle intervention                            | 1 set          | 140.14              | HELP PD |
| Usual care                                        | 1 set          | 21.15               | HELP PD |
| <b>Lab tests and procedures</b>                   |                |                     |         |
| Fasting blood glucose                             | 1              | 6.80                | 11      |
| Prescription medications                          | 6-month supply | 63.07               | 17      |
| <b>Bundled medical services</b>                   |                |                     |         |
| Hospitalization (lifestyle weight-loss condition) | 1 day          | 21,718              | 1, 15   |
| Hospitalization (usual care condition)            | 1 day          | 12,489              | 15, 16  |
| Emergency room visits                             | 1 visit        | 707                 | 15, 16  |
| Outpatient procedures                             | 1 visit        | 857                 | 15, 16  |
| Other outpatient visits                           | 1 visit        | 525                 | 15, 16  |
| <b>DIRECT NONMEDICAL COSTS</b>                    |                |                     |         |
| <b>Participant time</b>                           |                |                     |         |
| Self-monitoring                                   | 1 hour         | 5.33                | 3       |
| People who dislike exercise                       | 1 hour         | 10.65               | 3       |
| People who are neutral about exercise             | 1 hour         | 5.33                | 3       |
| Shopping and cooking                              | 1 hour         | 5.33                | 3       |
| <b>Services</b>                                   |                |                     |         |
| Health club                                       | 2 years        | 101.92              | 10      |
| Exercise classes                                  | 1 week         | 10.10               | 14      |
| Commercial weight-loss program                    | 1 month        | 38.41               | 12      |
| <b>Fitness equipment</b>                          |                |                     |         |
| Exercise shoes                                    | 1 pair         | 82.42               | 4       |
| Bicycle                                           | 1              | 456.07              | 4       |
| Exercise videos                                   | 1              | 10.39               | 7       |

|                             |        |         |    |
|-----------------------------|--------|---------|----|
| Free weights                | 2      | 21.18   | 13 |
| Home gym                    | 1      | 1671.22 | 13 |
| Stationary bicycle          | 1      | 574.53  | 4  |
| Step (for aerobics)         | 1      | 63.99   | 13 |
| Tennis racquet              | 1      | 84.69   | 13 |
| Treadmill                   | 1      | 2075.79 | 4  |
| Exercise ball               | 1      | 23.26   | 13 |
| Wii                         | 1      | 312.57  | 9  |
| <b>Food equipment</b>       |        |         |    |
| Air popper                  | 1      | 27.71   | 7  |
| Blender                     | 1      | 40.80   | 7  |
| Cookbooks                   | 1      | 13.73   | 7  |
| Cooking videos              | 1      | 21.92   | 8  |
| Freezer                     | 1      | 530.44  | 4  |
| Microwave                   | 1      | 196.15  | 4  |
| Mixer                       | 1      | 104.62  | 7  |
| Steamer                     | 1      | 29.86   | 7  |
| Wok                         | 1      | 36.56   | 7  |
| <b>Food costs</b>           |        |         |    |
| Food at home                | 1 year | 2092.75 | 5  |
| Food away from home         | 1 year | 1922.88 | 5  |
| <b>Transportation costs</b> | 1 mile | 0.55    | 6  |

HELP PD, Healthy Living Partnerships to Prevent Diabetes

## Appendix References

1. HCUPnet, Healthcare Cost and Utilization Project. Agency for Healthcare Research and Quality, Rockville MD. [hcupnet.ahrq.gov/](http://hcupnet.ahrq.gov/).
2. Craig CL, Marshall AL, Sjostrom M, et al. International physical activity questionnaire: 12-country reliability and validity. *Med Sci Sports Exerc* 2003;35(8):1381–95.
3. U.S. Department of Labor, Bureau of Labor Statistics. National compensation survey: occupational wages in the U.S., 2010. [www.bls.gov](http://www.bls.gov).

4. Consumers Union. Items reviewed in years 2005–2011. Consumer Reports:  
[www.consumerreports.org](http://www.consumerreports.org).
5. U.S. Department of Agriculture. Economic Research Service Food Expenditure Series.  
[www.ers.usda.gov/Briefing/CPIFoodAndExpenditures/Data/Expenditures\\_tables/table13.htm](http://www.ers.usda.gov/Briefing/CPIFoodAndExpenditures/Data/Expenditures_tables/table13.htm).
6. Internal Revenue Service. 2010 standard mileage rates. [www.irs.gov](http://www.irs.gov).
7. Wal-Mart retailer. [www.walmart.com](http://www.walmart.com).
8. Amazon.com online retailer. [www.amazon.com](http://www.amazon.com).
9. Best Buy electronics stores. [www.bestbuy.com](http://www.bestbuy.com).
10. YMCA of Northwest North Carolina. [www.ymcanwnc.org](http://www.ymcanwnc.org).
11. 2010 clinical laboratory fee schedule. Centers for Medicare and Medicaid Services.  
[www.cms.gov](http://www.cms.gov).
12. Weight Watchers weight-loss program. Membership options. [www.weightwatchers.com](http://www.weightwatchers.com).
13. Sports Authority sports stores. [www.sportsauthority.com](http://www.sportsauthority.com).
14. Jazzercise, Inc. Aerobics and dance class weekly fee schedule. [www.jazzercise.com](http://www.jazzercise.com).
15. MEPSnet, Medical Expenditure Panel Survey. Agency for Healthcare Research and Quality,  
Rockville MD. [meps.ahrq.gov/](http://meps.ahrq.gov/).
16. Medicare Physician Fee Schedule 2010. [www.cms.gov](http://www.cms.gov).
17. Drugstore.com online pharmacy. [www.drugstore.com](http://www.drugstore.com).
